# Supplementary material for: Stratum corneum molecular mobility in the presence of natural moisturizers
Source: Royal Society of Chemistry journal article supplement (doi:10.1039/c4sm00137k), 2014-01-01
Supplement: c4sm00137k1.pdf [file c4sm00137k1.pdf]

## Electronic Supplementary Material

### Stratum corneum molecular mobility in the presence of natural moisturizers

Sebastian Björklund,<sup>‡,\*</sup> Jenny Marie Andersson, Quoc Dat Pham, Agnieszka Nowacka, Daniel Topgaard and Emma Sparr

Division of Physical Chemistry, The Center for Chemistry and Chemical Engineering, Lund University, P.O. Box 124, SE-22100 Lund, Sweden

<sup>‡</sup>Present address: Department of Biomedical Sciences, Faculty of Health and Society, Malmö University, Jan Waldenströms gata 25, 214 28 Malmö, Sweden

\*Corresponding author (sebastianbjorklund@gmail.com)

**Table S1** <sup>13</sup>C chemical shifts (ppm) of carbons in urea, glycerol, PCA, and UCA. The assignment is based on corresponding spectra from SDBS. (Web: <http://sdb.srioddb.aist.go.jp>, National Institute of Advanced Industrial Science and Technology). The measured spectra of pure UCA showed non-resolved clusters of CP peaks. Therefore, the chemical shifts for UCA is given here by the values from the database (SDBS).

| Carbon no. | Urea  | Glycerol | PCA   | UCA   |
|------------|-------|----------|-------|-------|
| 1          | 163.3 | 63.9     | 25.5  | 115.0 |
| 2          |       | 73.3     | 30.4  | 123.5 |
| 3          |       |          | 57.1  | 134.1 |
| 4          |       |          | 177.1 | 135.4 |
| 5          |       |          | 182.5 | 137.7 |
| 6          |       |          |       | 168.0 |

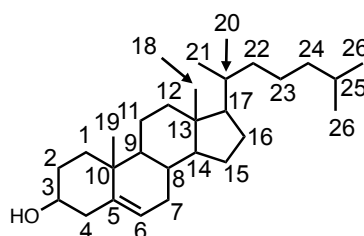

**Fig. S1** Standard numbering of cholesterol carbons.

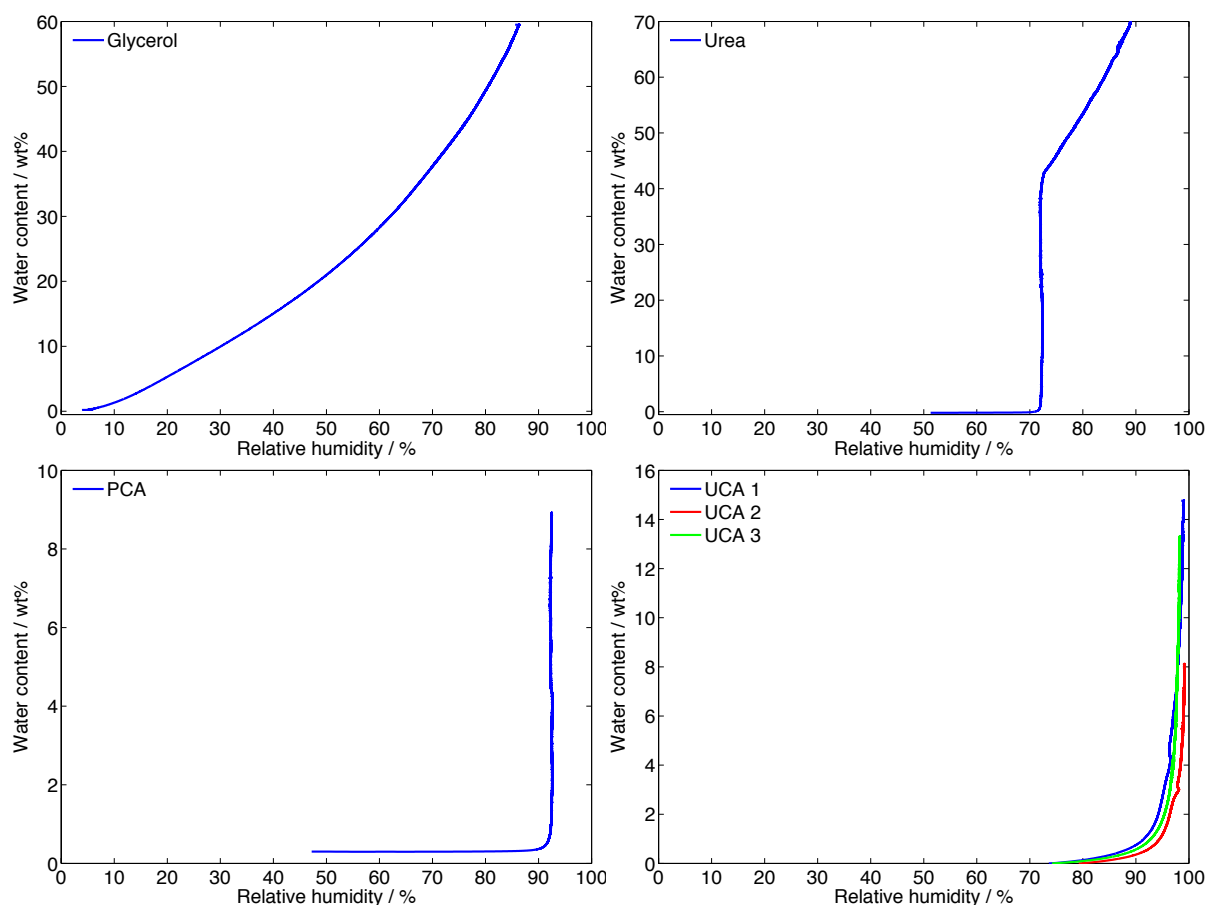

**Fig. S2** Sorption isotherms of pure glycerol, urea, PCA, and UCA at 32 °C. Glycerol is a hygroscopic liquid that takes up water continuously upon increasing RH. Urea is a solid that starts to take up water around 72% RH, which corresponds to the vapor pressure over a saturated solution of urea, and the solution is then diluted when the RH increases further. The sorption isotherm for PCA is similar to the isotherm obtained for urea, but PCA starts to take up water at a higher RH of approx. 92%. The sorption isotherm for UCA is more complex as it shows signs of a non-equilibrium effect (a kink around ~4wt% and ~95% RH), which can be associated to amorphous recrystallization. To investigate the reproducibility of this non-equilibrium effect we performed triplicate measurements on UCA. Although some small differences are observed, the characteristic kink was reproduced, suggesting that the samples contained varying amount of amorphous material at the start of the experiment.

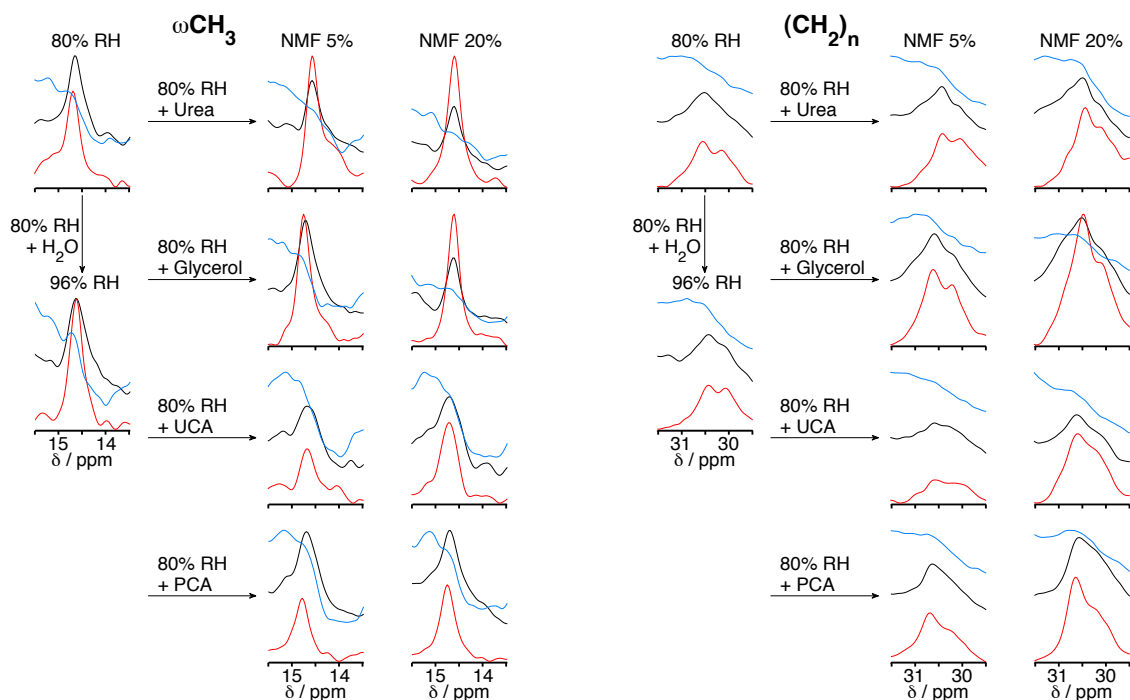

**Fig. S3** Close-up PT ssNMR  $^{13}\text{C}$  spectra (DP = grey, CP = blue, INEPT = red) of selected lipid resonances in SC samples with or without glycerol, urea, PCA, or UCA.

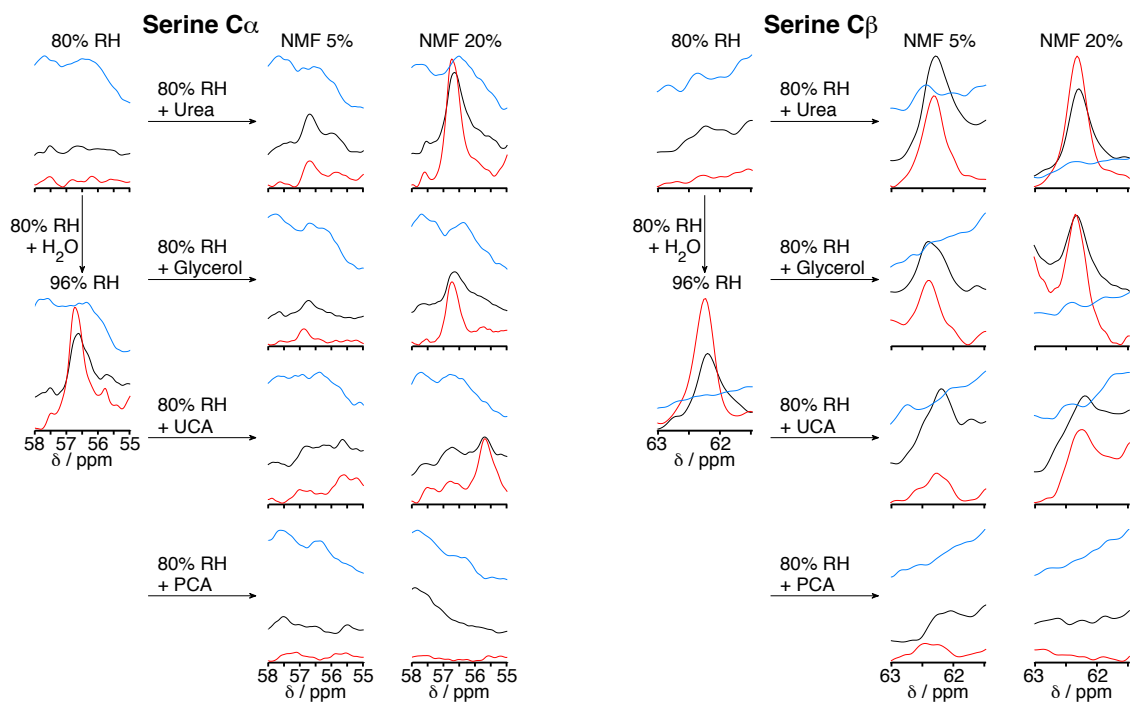

**Fig. S4** Close-up PT ssNMR  $^{13}\text{C}$  spectra (DP = grey, CP = blue, INEPT = red) of selected protein resonances in SC samples with or without glycerol, urea, PCA, or UCA.
